# Supplementary material
Source: PubMed Central journal article supplement (PMC1143639)
Supplement: jvirol_79_12_7889__2.pdf [file jvirol_79_12_7889__2.pdf]

**SupplementaryTable 1.** C-terminal PDZ-ligand motif mutant Jagged1 ( $\Delta$ Jagged1) cooperates with HPV-16 E6 and E7 in transformation of HaCaT cells in *in vitro* soft agar colony formation assays<sup>a</sup>.

|                | <i>HaCaT-Neo</i> | <i>HaCaT-Jagged1</i>           | <i>HaCaT-<math>\Delta</math>Jagged1</i> |                                |
|----------------|------------------|--------------------------------|-----------------------------------------|--------------------------------|
|                |                  |                                | Neo                                     | MFng                           |
| <b>Neo</b>     | 4.3 $\pm$ 0.8    | 4 $\pm$ 0.5                    | 4.6 $\pm$ 1.2                           | 4 $\pm$ 0.57                   |
| <b>E6 + E7</b> | 6.6 $\pm$ 0.8    | <b>20.3 <math>\pm</math> 2</b> | <b>22 <math>\pm</math> 1.5</b>          | <b>12 <math>\pm</math> 1.7</b> |

<sup>a</sup> The data represent mean  $\pm$  standard errors of three independent experiments. HaCaT cells stably expressing mock vector (HaCaT Neo), Jagged1 (HaCaT-Jagged1) and c-terminus PDZ-binding motif mutant Jagged1 (HaCaT- $\Delta$ Jagged1) are shown in boldface italics, and transient transfections of plasmids encoding E6 and E7, mock neomycin resistance (Neo) alone or along with Manic Fringe (MFng) are shown in boldface type. Increase and decrease in colony numbers are shown in red and blue, respectively.

## Supplementary Table 2

Table represents the list of genes either up or downregulated in the microarray analysis of HaCaT cells stably expressing either Jagged1 or Delta1. We used DNA microarrays printed with 9600 distinct human transcripts obtained from the Ontario Cancer Microarray Centre (<http://www.uhnres.utoronto.co/services/microarray/products.html>). Complete protocols for the generation of fluorescence-labeled cDNA from total RNA, hybridization to microarrays and image processing can be found at the array web site. Briefly, total RNA (50µg) was extracted from HaCaT cells stably expressing DSL-ligands (Jagged1 or Delta1) or mock vector (Neo) according to the manufacturer's instructions using Qiagen Rneasy kit and were used to create CY3- or CY5-labeled cDNA by using Micro Max Direct cDNA labeling kit (NEN). Samples were hybridized for 16 h and washed at Genomic Solutions (GS) automatic hybridization station using a step down protocol provided by the manufacturer. Fluorescence intensities were captured using a GS LS-IV scanner, analyzed and normalized by GS Array Analyzer software. A minimum of four experiments (including the reverse Cy3/Cy5 labeling) was performed with each sample to establish the relative fold differences in gene expression. For each clone, coefficient of variation (CV) was used to determine the reproducibility of hybridization signals {i.e., if the CV is close to 0, then the reproducibility is perfect} (14). Genes whose expression levels were consistently altered by more than a factor of 1.7 (up or down), in at least three of the experiments were identified. The complete list of clones that showed consistent up or down regulation is provided along with statistics in individual columns of the table [Exp-Experiment number, Aver.ratio-Average Ratio, Std.Dev-Standard Deviation, Std.Err-Standard Error, Coff.Var-Coefficient of Variation]. The table shows genes up and down regulated in HaCaT-Jagged1 and -Delta1 cells sequentially.

## Supplementary Table 1

### HaCat Neo Vs HaCat Jagged1

### UPREGULATED GENES

| Gene Name                                                 | GeneID | Normalized Expression Ratio |       |       |       |            | Aver.ratio | Std.Dev  | Std.Err  | Coff.Var |
|-----------------------------------------------------------|--------|-----------------------------|-------|-------|-------|------------|------------|----------|----------|----------|
|                                                           |        | Exp1                        | Exp2  | Exp3  | Exp4  |            |            |          |          |          |
| fatty acid binding protein 5 (psoriasis-associated)       | H00627 | 2.108                       | 3.027 | 1.945 | 2.03  | 2.27748522 | 0.5038051  | 0.251903 | 0.221211 |          |
| keratin 7                                                 | H03673 | 2.13                        | 2.09  | 2.47  | 2.06  | 2.1875     | 0.1905037  | 0.095252 | 0.087087 |          |
| cyclin-dependent kinase 9 (CDC2-related kinase)           | H05457 | 2.364                       | 2.182 | 1.864 | 2.246 | 2.1640121  | 0.2137202  | 0.10686  | 0.098761 |          |
| collagen, type XVIII, alpha 1                             | H08667 | 3.624                       | 2.511 | 2.78  | 2.84  | 2.93858952 | 0.4786562  | 0.239328 | 0.162886 |          |
| guanine nucleotide binding protein (G protein), q polypep | H09598 | 2.83                        | 2.03  | 5.54  | 2.83  | 3.3075     | 1.5353691  | 0.767685 | 0.464208 |          |
| CD1D antigen, d polypeptide                               | H11025 | 10.07                       | 2.15  | 3.21  | 3.11  | 4.635      | 3.6547093  | 1.827355 | 0.788503 |          |
| putative DNA binding protein                              | H12670 | 2.35                        | 2.13  | 2.83  | 1.99  | 2.325      | 0.3678315  | 0.183916 | 0.158207 |          |
| copine III                                                | H12998 | 3.88                        | 3.31  | 3.03  | 1.77  | 2.9975     | 0.8914922  | 0.445746 | 0.297412 |          |
| collagen, type XI, alpha 2                                | H13347 | 2.178                       | 2.91  | 2.26  | 1.99  | 2.33441118 | 0.4000143  | 0.200007 | 0.171356 |          |
| small nuclear ribonucleoprotein polypeptides B and B1     | H13355 | 2.186                       | 1.984 | 2.32  | 2.57  | 2.26505622 | 0.2457591  | 0.12288  | 0.1085   |          |
| p21-activated protein kinase 6                            | H15287 | 3.982                       | 2.625 | 2.517 | 2.94  | 3.01606349 | 0.6687028  | 0.334351 | 0.221714 |          |
| CGI-204 protein                                           | H16597 | 2.364                       | 2.112 | 2.09  | 2.02  | 2.14655779 | 0.1502371  | 0.075119 | 0.06999  |          |
| cyclin D1 (PRAD1- parathyroid adenomatosis 1)             | H20529 | 2.11                        | 1.93  | 2.22  | 2.42  | 2.17       | 0.2051016  | 0.102551 | 0.094517 |          |
| scaffold attachment factor B                              | H21122 | 5.57                        | 2.94  | 1.84  | 3.22  | 3.3925     | 1.5691054  | 0.784553 | 0.462522 |          |
| transglutaminase 2 (C polypeptide, protein-glutamine-ga   | H22933 | 2.114                       | 3.83  | 2.7   | 2.25  | 2.72339453 | 0.7791237  | 0.389562 | 0.286086 |          |
| vitronectin (serum spreading factor, somatomedin B, con   | H29155 | 3.24                        | 3.06  | 2.92  | 1.91  | 2.7825     | 0.5962312  | 0.298116 | 0.214279 |          |
| intercellular adhesion molecule 2                         | H29482 | 1.96                        | 1.77  | 7.35  | 4.08  | 3.79       | 2.5940316  | 1.297016 | 0.684441 |          |
| zinc finger protein 238                                   | H29607 | 2.111                       | 2.722 | 2.645 | 2.03  | 2.37693046 | 0.3569326  | 0.178466 | 0.150165 |          |
| leptin (murine obesity homolog)                           | H39701 | 2.63                        | 2.58  | 2.26  | 2.02  | 2.3725     | 0.2865164  | 0.143258 | 0.120766 |          |
| paired basic amino acid cleaving system 4                 | H69430 | 1.963                       | 2.039 | 2.05  | 1.81  | 1.96532486 | 0.1105595  | 0.05528  | 0.056255 |          |
| follistatin                                               | R01927 | 2.41                        | 2.18  | 3.4   | 3.19  | 2.795      | 0.5911853  | 0.295593 | 0.211515 |          |
| ets variant gene 4 (E1A enhancer-binding protein, E1AF)   | R07222 | 2.752                       | 2.89  | 2.08  | 2.04  | 2.44045742 | 0.4432219  | 0.221611 | 0.181614 |          |
| aldehyde dehydrogenase 5 family, member A1 (succinat      | R11674 | 2.31                        | 2.23  | 2.05  | 3.14  | 2.4325     | 0.4840368  | 0.242018 | 0.198987 |          |
| nucleolar protein 1 (120kD)                               | R11719 | 2.075                       | 2.03  | 1.78  | 2.11  | 1.99878736 | 0.1494898  | 0.074745 | 0.07479  |          |
| secreted protein, acidic, cysteine-rich (osteonectin)     | R12744 | 2.74                        | 2.4   | 1.78  | 3.13  | 2.5125     | 0.5722106  | 0.286105 | 0.227746 |          |
| early growth response 3                                   | R13988 | 2.29                        | 2.06  | 2.14  | 2.26  | 2.1875     | 0.1068878  | 0.053444 | 0.048863 |          |
| APG5 (autophagy 5, S. cerevisiae)-like                    | R14042 | 3.407                       | 2.532 | 2.3   | 1.97  | 2.55234202 | 0.6148822  | 0.307441 | 0.240909 |          |
| EphA7                                                     | R15219 | 2.41                        | 4.01  | 3.88  | 0.52  | 2.705      | 1.6273598  | 0.81368  | 0.601612 |          |
| carbohydrate (chondroitin 6/keratan) sulfotransferase 1   | R15740 | 2.8                         | 1.94  | 3.2   | 2.04  | 2.495      | 0.6069322  | 0.303466 | 0.243259 |          |
| trophinin                                                 | R17436 | 3.51                        | 2.75  | 2.24  | 1.82  | 2.58       | 0.7273239  | 0.363662 | 0.281908 |          |
| core1 UDP-galactose N-acetylgalactosamine-alpha-R be      | R22983 | 6.54                        | 2.51  | 4.37  | 3.85  | 4.3175     | 1.6760942  | 0.838047 | 0.388209 |          |
| protein tyrosine phosphatase, non-receptor type 21        | R23593 | 2.86                        | 1.961 | 2.68  | 1.87  | 2.34274272 | 0.5000613  | 0.250031 | 0.213451 |          |
| interferon-stimulated transcription factor 3, gamma (48k  | R34002 | 1.989                       | 3.39  | 7.1   | 4.86  | 4.33467232 | 2.1847234  | 1.092362 | 0.504011 |          |
| arylsulfatase A                                           | R39701 | 3.773                       | 2.304 | 3.81  | 2.51  | 3.09935668 | 0.8038328  | 0.401916 | 0.259355 |          |

|                                                              |        |       |       |       |       |            |           |          |          |
|--------------------------------------------------------------|--------|-------|-------|-------|-------|------------|-----------|----------|----------|
| CDC5 (cell division cycle 5, <i>S. pombe</i> , homolog)-like | R40873 | 2.61  | 2.2   | 5.2   | 2.85  | 3.215      | 1.3502716 | 0.675136 | 0.419991 |
| Snf2-related CBP activator protein                           | R44375 | 3.174 | 2.825 | 6.01  | 3     | 3.75228651 | 1.5118596 | 0.75593  | 0.402917 |
| MADS box transcription enhancer factor 2, polypeptide C      | R59202 | 2.44  | 2.35  | 2.75  | 2.38  | 2.48       | 0.1838478 | 0.091924 | 0.074132 |
| ADP-ribosylation factor domain protein 1, 64kD               | R60064 | 3.504 | 2.96  | 2.5   | 1.76  | 2.68114005 | 0.7386076 | 0.369304 | 0.275483 |
| fibronectin leucine rich transmembrane protein 2             | R60392 | 4.79  | 3.86  | 2.53  | 2.76  | 3.485      | 1.045833  | 0.522917 | 0.300096 |
| clusterin-like 1 (retinal)                                   | R61492 | 1.99  | 7.59  | 3.859 | 2.572 | 4.00269499 | 2.5159785 | 1.257989 | 0.628571 |
| restin (Reed-Steinberg cell-expressed intermediate filam     | R69282 | 4.178 | 2.26  | 2.42  | 2.62  | 2.86946602 | 0.8846105 | 0.442305 | 0.308284 |
| paired-like homeodomain transcription factor 2               | R78177 | 4.23  | 2.71  | 2.743 | 2.131 | 2.95333191 | 0.8963376 | 0.448169 | 0.3035   |
| activating transcription factor 4 (tax-responsive enhancer   | R81715 | 0.323 | 0.14  | 0.21  | 2     | 0.66835496 | 0.8909746 | 0.445487 | 1.333086 |
| VW domain-containing oxidoreductase                          | T74734 | 2.88  | 2.47  | 1.92  | 3.43  | 2.675      | 0.6387749 | 0.319387 | 0.238794 |
| phosphoinositide-3-kinase, regulatory subunit, polypeptic    | T78213 | 1.995 | 2.05  | 1.95  | 1.88  | 1.96886137 | 0.0719775 | 0.035989 | 0.036558 |
| dedicator of cyto-kinesis 3                                  | T80400 | 1.78  | 2.09  | 1.89  | 2.12  | 1.97       | 0.1626858 | 0.081343 | 0.082582 |
| endothelial differentiation-related factor 1                 | T82048 | 2.69  | 2.19  | 2.408 | 2.24  | 2.38204953 | 0.2255204 | 0.11276  | 0.094675 |
| homogentisate 1,2-dioxygenase (homogentisate oxidase         | T83013 | 2     | 5.35  | 5.1   | 3.4   | 3.9625     | 1.5691691 | 0.784585 | 0.396005 |
| PDZ domain containing 1                                      | T85956 | 3.56  | 3.45  | 2.7   | 3.12  | 3.2075     | 0.3865553 | 0.193278 | 0.120516 |
| expressed in activated T/LAK lymphocytes                     | T86350 | 1.99  | 2.05  | 1.81  | 0.277 | 1.53183981 | 0.8425152 | 0.421258 | 0.550002 |
| platelet/endothelial cell adhesion molecule (CD31 antigen    | T97049 | 3.48  | 2.83  | 2.98  | 3.22  | 3.1275     | 0.2846489 | 0.142324 | 0.091015 |
| cathepsin K (pseudochondrodystrophy)                         | R00859 | 3.1   | 2.662 | 3.041 | 2.932 | 2.93354467 | 0.1941852 | 0.097093 | 0.066195 |
| matrix Gla protein                                           | H12634 | 2.262 | 2.027 | 2.132 | 2.242 | 2.16558938 | 0.1087184 | 0.054359 | 0.050203 |
| intercellular adhesion molecule 5, telencephalin             | H46937 | 1.95  | 1.79  | 2.12  | 1.88  | 1.935      | 0.1396424 | 0.069821 | 0.072167 |
| pleckstrin                                                   | H01482 | 2.71  | 2.36  | 2.71  |       | 2.59333333 | 0.2020726 | 0.116667 | 0.07792  |
| inositol(myo)-1(or 4)-monophosphatase 1                      | H02889 | 2.096 | 2.051 | 1.74  |       | 1.96252427 | 0.1940235 | 0.11202  | 0.098864 |
| calcium/calmodulin-dependent protein kinase (CaM kina        | H05538 | 6.15  | 2.29  | 2.12  |       | 3.52       | 2.2792323 | 1.315915 | 0.647509 |
| butyrylcholinesterase                                        | H05834 | 2.021 | 2.95  | 2.08  |       | 2.35032362 | 0.520173  | 0.300322 | 0.22132  |
| MCF.2 cell line derived transforming sequence                | H05800 | 1.81  | 2.7   | 2.13  |       | 2.21333333 | 0.4508141 | 0.260278 | 0.203681 |
| biphenyl hydrolase-like (serine hydrolase; breast epitheli   | H06847 | 3.014 | 2.16  | 2.15  |       | 2.44119741 | 0.4957337 | 0.286212 | 0.20307  |
| neuronal specific transcription factor DAT1                  | H08433 | 3.769 | 2.62  | 2.29  |       | 2.89295284 | 0.7762945 | 0.448194 | 0.26834  |
| adenylyl cyclase-associated protein 2                        | H08589 | 2.978 | 2.612 | 0.46  |       | 2.01641332 | 1.360245  | 0.785338 | 0.674586 |
| profilin 2                                                   | H10406 | 2.254 | 1.86  | 1.73  |       | 1.94805278 | 0.2729477 | 0.157586 | 0.140113 |
| inhibitor of DNA binding 3, dominant negative helix-loop-    | H13942 | 8.13  | 2.29  | 1.88  |       | 4.1        | 3.4960978 | 2.018473 | 0.852707 |
| guanine deaminase                                            | H14348 | 2.364 | 2.104 | 5.5   |       | 3.32256381 | 1.8902067 | 1.091311 | 0.5689   |
| islet cell autoantigen 1 (69kD)                              | H15227 | 2.67  | 3.78  | 2.43  |       | 2.96       | 0.7202083 | 0.415812 | 0.243314 |
| PWP2 (periodic tryptophan protein, yeast) homolog            | H16818 | 2.62  | 2.42  | 1.82  |       | 2.28666667 | 0.4163332 | 0.24037  | 0.18207  |
| core-binding factor, runt domain, alpha subunit 2; translo   | H17078 | 2.01  | 3.41  | 1.91  |       | 2.4433657  | 0.8386246 | 0.48418  | 0.343225 |
| calbindin 2, (29kD, calretinin)                              | H17963 | 3.377 | 2.01  | 1.85  |       | 2.41248506 | 0.8395091 | 0.484691 | 0.347985 |
| cell division cycle 42 (GTP-binding protein, 25kD)           | H18275 | 4.042 | 2.106 | 2.64  |       | 2.92953032 | 0.9997865 | 0.577227 | 0.341279 |
| Rab9 effector p40                                            | H20945 | 1.93  | 1.76  | 1.91  |       | 1.86666667 | 0.0929157 | 0.053645 | 0.049776 |
| caveolin 2                                                   | H21748 | 2.04  | 2.39  | 1.98  |       | 2.13666667 | 0.2214347 | 0.127845 | 0.103636 |
| Ris                                                          | H24125 | 2.94  | 2.12  | 1.79  |       | 2.28333333 | 0.592143  | 0.341874 | 0.259333 |
| STRIN protein                                                | H25541 | 2.062 | 1.948 | 1.78  |       | 1.93014789 | 0.1420238 | 0.081997 | 0.073582 |
| flavin containing monooxygenase 1                            | H39963 | 1.924 | 2.071 | 1.75  |       | 1.91524585 | 0.1609185 | 0.092906 | 0.08402  |
| elastase 2, neutrophil                                       | H58275 | 4.47  | 4.03  | 2.59  |       | 3.69666667 | 0.9833277 | 0.567725 | 0.266004 |
| acyl-Coenzyme A dehydrogenase, C-2 to C-3 short chair        | H65845 | 2.023 | 2.05  | 2     |       | 2.02442892 | 0.0250196 | 0.014445 | 0.012359 |
| recoverin                                                    | H87835 | 2.829 | 2.198 | 2.04  |       | 2.3559202  | 0.4176888 | 0.241153 | 0.177293 |

|                                                                                                           |        |       |       |      |            |           |               |          |
|-----------------------------------------------------------------------------------------------------------|--------|-------|-------|------|------------|-----------|---------------|----------|
| SWI/SNF related, matrix associated, actin dependent repressor 1, hepatic; LF-B1, hepatic nuclear factor 1 | R07823 | 1.964 | 1.915 | 2.26 | 2.0463234  | 0.1866837 | 0.107782      | 0.091229 |
| nuclear receptor coactivator 2                                                                            | R08880 | 2.484 | 1.979 | 1.81 | 2.09100227 | 0.350415  | 0.202312      | 0.167582 |
| ADP-ribosylation factor binding protein GGA1                                                              | R09705 | 2.209 | 2.29  | 2.01 | 2.16964401 | 0.1440752 | 0.083182      | 0.066405 |
| fragile X mental retardation, autosomal homolog 2                                                         | R09735 | 2.505 | 2.33  | 4.14 | 2.99161812 | 0.9983633 | 0.576405      | 0.33372  |
| ryanodine receptor 1 (skeletal)                                                                           | R11793 | 2.024 | 3.57  | 1.94 | 2.51131737 | 0.9178064 | 0.529896      | 0.365468 |
| SH3-domain GRB2-like 2                                                                                    | R12817 | 4.15  | 2.31  | 1.77 | 2.74333333 | 1.2477713 | 0.720401      | 0.454838 |
| branched chain aminotransferase 2, mitochondrial                                                          | R13964 | 1.99  | 2.04  | 2.03 | 2.02       | 0.0264575 | 0.015275      | 0.013098 |
| mitochondrial ribosomal protein L19                                                                       | R14309 | 2.055 | 2.56  | 2.28 | 2.29840782 | 0.2528912 | 0.146007      | 0.110029 |
| lipopolysaccharide-binding protein                                                                        | R15731 | 7.59  | 2.45  | 2.34 | 4.12666667 | 2.9998389 | 1.731958      | 0.72694  |
| anaphase-promoting complex 2                                                                              | R20845 | 3.43  | 2.24  | 2.08 | 2.58333333 | 0.7375862 | 0.425846      | 0.285517 |
| hydroxysteroid (11-beta) dehydrogenase 2                                                                  | R23749 | 2.84  | 2.08  | 1.77 | 2.23       | 0.5505452 | 0.317857      | 0.246881 |
| Down syndrome critical region gene 1-like 2                                                               | R26919 | 4.49  | 1.93  | 1.98 | 2.8        | 1.4637964 | 0.845123      | 0.522784 |
| solute carrier family 5 (sodium-dependent vitamin transporter)                                            | R34261 | 4.34  | 2.64  | 2.6  | 3.19333333 | 0.9932438 | 0.57345       | 0.311037 |
| ribosomal protein L14                                                                                     | R46217 | 2.02  | 1.9   | 1.74 | 1.88654711 | 0.1403052 | 0.081005      | 0.074371 |
| phospholipid transfer protein                                                                             | R50551 | 2.95  | 2.85  | 1.81 | 2.53666667 | 0.631295  | 0.364478      | 0.248868 |
| checkpoint with forkhead and ring finger domains                                                          | R55178 | 2.54  | 2.26  | 2.23 | 2.34333333 | 0.1709776 | 0.098714      | 0.072963 |
| cyclin-E binding protein 1                                                                                | R59506 | 1.76  | 2.89  | 2.2  | 2.28333333 | 0.5695905 | 0.328853      | 0.249456 |
| paralemmin                                                                                                | R60222 | 2.195 | 1.92  | 1.77 | 1.96165049 | 0.2155157 | 0.124428      | 0.109864 |
| neurobeachin                                                                                              | R60879 | 1.93  | 1.85  | 1.81 | 1.86333333 | 0.061101  | 0.035277      | 0.032791 |
| BAI1-associated protein 3                                                                                 | R60906 | 1.76  | 2.388 | 2.21 | 2.11942404 | 0.3237815 | 0.186935      | 0.152769 |
| inositol 1,4,5-triphosphate receptor, type 2                                                              | R61092 | 2.07  | 2.19  | 5.56 | 3.27333333 | 1.9812202 | 1.143858      | 0.605261 |
| centromere protein B (80kD)                                                                               | R61381 | 1.83  | 1.83  | 2.22 | 1.96       | 0.2251666 | 0.13          | 0.114881 |
| prodynorphin                                                                                              | R61508 | 1.79  | 2.29  | 1.86 | 1.98       | 0.2707397 | 0.156312      | 0.136737 |
| ectonucleoside triphosphate diphosphohydrolase 6 (putative)                                               | R61762 | 2.879 | 2.48  | 3.37 | 2.90976848 | 0.4457813 | 0.257372      | 0.153202 |
| heat shock transcription factor 1                                                                         | R76298 | 2.355 | 1.981 | 1.76 | 2.03210356 | 0.3007043 | 0.173612      | 0.147977 |
| small inducible cytokine subfamily D (Cys-X3-Cys), member 1                                               | R87691 | 2.71  | 1.94  | 1.78 | 2.14333333 | 0.4972256 | 0.287073      | 0.231987 |
| Link guanine nucleotide exchange factor II                                                                | R87983 | 1.82  | 1.8   | 6.09 | 3.23666667 | 2.4710794 | 1.426678      | 0.763464 |
| guanine nucleotide binding protein (G protein), beta 5                                                    | R94499 | 1.92  | 2.1   | 1.97 | 1.99666667 | 0.0929157 | 0.053645      | 0.046535 |
| inositol 1,4,5-triphosphate receptor, type 3                                                              | T80464 | 1.945 | 2.24  | 1.81 | 1.99828479 | 0.219923  | 0.126973      | 0.110056 |
| prohibitin                                                                                                | T80625 | 5.83  | 2.37  | 3.62 | 3.94       | 1.7520559 | 1.01155       | 0.444684 |
| pleckstrin                                                                                                | H26072 | 1.93  | 3.94  | 6.95 | 4.27333333 | 2.5265457 | 1.458702      | 0.591235 |
| lysophosphatidic acid acyltransferase-delta                                                               | H18455 | 3.09  | 2.08  | 1.88 | 2.35       | 0.6486139 | 0.374477      | 0.276006 |
| junctional adhesion molecule                                                                              | R01692 | 2.84  | 2.42  | 2.3  | 2.52       | 0.2835489 | <b>0.1637</b> | 0.112519 |
| hairy/enhancer-of-split related with YRPW motif 1                                                         | H18233 | 2.2   | 2.22  | 2.09 | 2.17       | 0.07      | <b>0.0404</b> | 0.032258 |
|                                                                                                           |        | 2.2   | 1.8   | 2.27 | 2.09       | 0.2535744 | <b>0.1464</b> | 0.121327 |

## HaCat Neo Vs HaCat Jagged1

## DOWNREGULATED GENES

## Normalized Expression Ratio

| Gene Name                                              | GeneID | Exp1  | Exp2  | Exp3  | Exp4  | Aver.ratio | Std.Dev   | Std.Err  | Coff.Var |
|--------------------------------------------------------|--------|-------|-------|-------|-------|------------|-----------|----------|----------|
| spermidine/spermine N1-acetyltransferase               | H03112 | 0.266 | 0.377 | 0.31  | 0.32  | 0.31835437 | 0.0455024 | 0.022751 | 0.14293  |
| claudin 1                                              | H03348 | 0.441 | 0.511 | 0.46  | 0.51  | 0.48042108 | 0.0357354 | 0.017868 | 0.074384 |
| ras homolog gene family, member I                      | H09686 | 0.12  | 0.13  | 0.132 | 0.144 | 0.1315     | 0.0098489 | 0.004924 | 0.074896 |
| RAP1B, member of RAS oncogene family                   | H10327 | 0.38  | 0.59  | 0.48  | 0.362 | 0.453      | 0.1050524 | 0.052526 | 0.231904 |
| tissue factor pathway inhibitor 2                      | H12333 | 0.399 | 0.483 | 0.235 | 0.253 | 0.34250063 | 0.1191953 | 0.059598 | 0.348015 |
| aldolase A, fructose-bisphosphate                      | H13744 | 0.351 | 0.357 | 0.27  | 0.301 | 0.31976992 | 0.0416762 | 0.020838 | 0.130332 |
| ATPase, Na+/K+ transporting, alpha 3 polypeptide       | H14143 | 0.452 | 2.17  | 0.24  | 0.27  | 0.78297324 | 0.9294118 | 0.464706 | 1.187029 |
| Rac/Cdc42 guanine exchange factor (GEF) 6              | H14999 | 0.122 | 0.155 | 0.33  | 0.46  | 0.2667233  | 0.1579182 | 0.078959 | 0.592067 |
| acyl-Coenzyme A oxidase 1, palmitoyl                   | H15642 | 0.22  | 0.58  | 0.26  | 0.51  | 0.3925     | 0.1791415 | 0.089571 | 0.456411 |
| ATP-binding cassette, sub-family C (CFTR/MRP), memb    | H16193 | 0.233 | 0.253 | 0.24  | 0.31  | 0.25891748 | 0.0351018 | 0.017551 | 0.135571 |
| RAB5B, member RAS oncogene family                      | H18154 | 0.37  | 0.5   | 0.11  | 0.13  | 0.2775     | 0.1896268 | 0.094813 | 0.68334  |
| EGF-like repeats and discoidin I-like domains 3        | H19297 | 0.421 | 0.465 | 0.42  | 0.43  | 0.43395709 | 0.0208651 | 0.010433 | 0.048081 |
| Ran GTPase activating protein 1                        | H21130 | 0.539 | 0.55  | 0.234 | 0.288 | 0.40246087 | 0.1651397 | 0.08257  | 0.410325 |
| NADH dehydrogenase (ubiquinone) Fe-S protein 7 (20kD)  | H21214 | 0.162 | 0.164 | 0.5   | 0.07  | 0.22409223 | 0.1891126 | 0.094556 | 0.843905 |
| keratin 15                                             | H21366 | 0.496 | 0.542 | 0.16  | 0.17  | 0.34207282 | 0.2053607 | 0.10268  | 0.600342 |
| catenin (cadherin-associated protein), alpha 1H        | H22022 | 0.47  | 0.5   | 0.44  | 0.46  | 0.4675     | 0.025     | 0.0125   | 0.053476 |
| ATP synthase, H+ transporting, mitochondrial F0 comple | H25157 | 0.529 | 0.532 | 0.335 | 0.337 | 0.43318622 | 0.1125036 | 0.056252 | 0.259712 |
| interferon induced transmembrane protein 1 (9-27)      | H25306 | 0.531 | 0.546 | 0.392 | 0.42  | 0.47230445 | 0.0775707 | 0.038785 | 0.164239 |
| FXRD domain-containing ion transport regulator 5       | H25585 | 0.432 | 0.47  | 0.56  | 0.6   | 0.51557282 | 0.0777149 | 0.038857 | 0.150735 |
| CD81 antigen (target of antiproliferative antibody 1)  | H26124 | 0.36  | 0.431 | 0.268 | 0.292 | 0.33774621 | 0.0732793 | 0.03664  | 0.216966 |
| gelsolin (amyloidosis, Finnish type)                   | H26465 | 0.438 | 0.478 | 0.329 | 0.415 | 0.41487001 | 0.0629619 | 0.031481 | 0.151763 |
| discoidin domain receptor family, member 1             | H27334 | 0.388 | 0.443 | 0.22  | 0.26  | 0.32778641 | 0.10512   | 0.05256  | 0.320697 |
| v-Ha-ras Harvey rat sarcoma viral oncogene homolog     | H27352 | 0.274 | 0.364 | 0.15  | 0.27  | 0.26445631 | 0.0877094 | 0.043855 | 0.331659 |
| KIAA0441 gene product                                  | H29924 | 0.54  | 0.362 | 0.44  | 0.61  | 0.4881014  | 0.1089917 | 0.054496 | 0.223297 |
| integrin, alpha 3 (antigen CD49C, alpha 3 subunit)     | H41926 | 0.322 | 0.415 | 0.388 | 0.364 | 0.37229126 | 0.0393717 | 0.019686 | 0.105755 |
| cytochrome c oxidase subunit VIII                      | H43653 | 0.433 | 0.479 | 0.244 | 0.288 | 0.36088522 | 0.1125974 | 0.056299 | 0.312003 |
| neogenin (chicken) homolog 1                           | H44733 | 0.404 | 0.488 | 0.16  | 0.19  | 0.3106355  | 0.1607565 | 0.080378 | 0.517509 |
| integrin cytoplasmic domain-associated protein 1       | H45010 | 0.06  | 0.08  | 0.06  | 0.064 | 0.066      | 0.0095219 | 0.004761 | 0.144271 |
| serum amyloid A1                                       | H45773 | 0.423 | 0.333 | 0.25  | 0.27  | 0.31899509 | 0.0778656 | 0.038933 | 0.244097 |
| PFTAIRE protein kinase 1                               | H46382 | 0.27  | 0.313 | 0.051 | 0.08  | 0.17871265 | 0.1321871 | 0.066094 | 0.739663 |
| organic cation transporter                             | H49989 | 0.49  | 0.5   | 0.4   | 0.56  | 0.4875     | 0.0660177 | 0.033009 | 0.135421 |
| ubiquitin-conjugating enzyme E2 variant 1              | H50029 | 0.417 | 0.428 | 0.31  | 0.47  | 0.40630097 | 0.0681225 | 0.034061 | 0.167665 |
| death effector filament-forming Ced-4-like apc homolog | H51285 | 0.36  | 0.46  | 0.38  | 0.42  | 0.405      | 0.0443471 | 0.022174 | 0.109499 |
| guanylate kinase associated kinesin                    | H51325 | 0.305 | 0.35  | 0.466 | 0.518 | 0.40985841 | 0.0989105 | 0.049455 | 0.241328 |
| HMT1 (hnRNP methyltransferase, S. cerevisiae)-like 2   | H52742 | 0.461 | 0.499 | 0.24  | 0.27  | 0.36728495 | 0.131409  | 0.065705 | 0.357785 |
| cytochrome c oxidase subunit IV                        | H52746 | 0.336 | 0.541 | 0.233 | 0.249 | 0.33978568 | 0.1418856 | 0.070943 | 0.417574 |
| homolog of yeast Nop10p                                | H58462 | 0.194 | 0.341 | 0.404 | 0.496 | 0.35867014 | 0.126906  | 0.063453 | 0.353824 |
| caspase 10, apoptosis-related cysteine protease        | H59563 | 0.33  | 0.36  | 0.42  | 0.34  | 0.3625     | 0.0403113 | 0.020156 | 0.111204 |

|                                                             |               |             |            |             |            |                   |                 |                 |                 |
|-------------------------------------------------------------|---------------|-------------|------------|-------------|------------|-------------------|-----------------|-----------------|-----------------|
| cytochrome P450, subfamily IIIA, polypeptide 7              | H67999        | 0.268       | 0.302      | 0.59        | 0.6        | 0.43981537        | 0.179777        | 0.089888        | 0.408756        |
| proteoglycan 2, bone marrow (natural killer cell activator, | H73057        | 0.264       | 0.388      | 0.38        | 0.41       | 0.36064039        | 0.0654374       | 0.032719        | 0.181448        |
| protein translocation complex beta                          | H73928        | 0.219       | 0.249      | 0.49        | 0.5        | 0.36452913        | 0.1511784       | 0.075589        | 0.414723        |
| heparan sulfate (glucosamine) 3-O-sulfotransferase 1        | H86876        | 0.552       | 0.44       | 0.28        | 0.52       | 0.44790291        | 0.121391        | 0.060696        | 0.271021        |
| growth differentiation factor 8                             | H92027        | 0.39        | 0.45       | 0.24        | 0.37       | 0.3625            | 0.088459        | 0.04423         | 0.244025        |
| hyaluronan-mediated motility receptor (RHAMM)               | R10284        | 0.41        | 0.45       | 0.34        | 0.39       | 0.3975            | 0.0457347       | 0.022867        | 0.115056        |
| retinoid x receptor interacting protein                     | R18164        | 0.3         | 0.43       | 0.13        | 0.15       | 0.2525            | 0.1405643       | 0.070282        | 0.55669         |
| phosphodiesterase 9A                                        | R19767        | 0.18        | 0.49       | 0.47        | 0.52       | 0.415             | 0.1580084       | 0.079004        | 0.380743        |
| synaptosomal-associated protein, 23kD                       | R22893        | 0.448       | 0.473      | 0.48        | 0.56       | 0.49025615        | 0.0485347       | 0.024267        | 0.098999        |
| protein kinase, cAMP-dependent, regulatory, type II, alph   | R23436        | 0.2         | 0.56       | 0.44        | 0.58       | 0.445             | 0.1746425       | 0.087321        | 0.392455        |
| heparan sulfate proteoglycan 2 (perlecan)                   | R23999        | 0.128       | 0.222      | 0.04        | 0.05       | 0.11003398        | 0.0843984       | 0.042199        | 0.767021        |
| heterogeneous nuclear ribonucleoprotein D (AU-rich eler     | R25899        | 0.175       | 0.201      | 0.22        | 0.24       | 0.2091165         | 0.0276352       | 0.013818        | 0.132152        |
| filamin B, beta (actin-binding protein-278)                 | R26320        | 0.278       | 0.446      | 0.097       | 0.135      | 0.23886317        | 0.1588164       | 0.079408        | 0.664884        |
| epithelial membrane protein 2                               | R32270        | 0.474       | 0.55       | 0.57        | 0.47       | 0.51591317        | 0.0515793       | 0.02579         | 0.099977        |
| PR domain containing 10                                     | R35195        | 0.466       | 0.37       | 0.29        | 0.39       | 0.37911677        | 0.0725108       | 0.036255        | 0.191262        |
| secretogranin II (chromogranin C)                           | R41603        | 0.448       | 0.454      | 0.48        | 0.51       | 0.47303227        | 0.0282962       | 0.014148        | 0.059819        |
| plakophilin 3                                               | R50489        | 0.456       | 0.53       | 0.155       | 0.191      | 0.33316711        | 0.1878547       | 0.093927        | 0.563845        |
| 3-hydroxy-3-methylglutaryl-Coenzyme A synthase 1 (sol       | R53567        | 0.41        | 0.44       | 0.5         | 0.57       | 0.48              | 0.0707107       | 0.035355        | 0.147314        |
| endothelin 1                                                | R55829        | 0.409       | 0.411      | 0.57        | 0.52       | 0.47740685        | 0.0806812       | 0.040341        | 0.168999        |
| retinoid X receptor, gamma                                  | R56631        | 0.39        | 0.39       | 0.32        | 0.44       | 0.385             | 0.0493288       | 0.024664        | 0.128127        |
| nuclear receptor interacting protein 1                      | R59543        | 0.44        | 0.49       | 0.48        | 0.49       | 0.475             | 0.0238048       | 0.011902        | 0.050115        |
| ciliary neurotrophic factor receptor                        | R73050        | 0.274       | 0.33       | 0.59        | 0.51       | 0.42593204        | 0.1486854       | 0.074343        | 0.349083        |
| lymphotoxin beta receptor (TNFR superfamily, member 3       | R77028        | 0.366       | 0.36       | 0.6         | 0.57       | 0.47397573        | 0.128806        | 0.064403        | 0.271757        |
| cholecystokinin                                             | R80701        | 0.38        | 0.44       | 0.43        | 0.41       | 0.415             | 0.0264575       | 0.013229        | 0.063753        |
| galactosidase, beta 1                                       | R83247        | 0.52        | 0.442      | 0.547       | 0.51       | 0.50475549        | 0.0446254       | 0.022313        | 0.08841         |
| ATP-binding cassette, sub-family A (ABC1), member 3         | R84724        | 0.56        | 0.43       | 0.35        | 0.44       | 0.445             | 0.0866025       | 0.043301        | 0.194612        |
| protein tyrosine phosphatase, receptor type, H              | R87386        | 0.49        | 0.5        | 0.46        | 0.35       | 0.45              | 0.0687992       | 0.0344          | 0.152887        |
| RaP2 interacting protein 8                                  | R87923        | 0.536       | 0.47       | 0.5         | 0.52       | 0.50649867        | 0.0284411       | 0.014221        | 0.056152        |
| Ran GTPase activating protein 1                             | R88426        | 0.47        | 0.57       | 0.47        | 0.291      | 0.45008323        | 0.1162176       | 0.058109        | 0.258214        |
| <b>plakophilin 4</b>                                        | <b>R89855</b> | 0.537       | 0.35       | 0.42        | 0.36       | 0.41683134        | 0.0860718       | 0.043036        | 0.206491        |
| keratin 13                                                  | T83421        | 0.238       | 0.303      | 0.55        | 0.358      | 0.3624501         | 0.1342658       | 0.067133        | 0.370439        |
| epithelial membrane protein 2                               | T88721        | 0.369       | 0.538      | 0.44        | 0.42       | 0.44181553        | 0.0710225       | 0.035511        | 0.160752        |
| programmed cell death 8 (apoptosis-inducing factor)         | T99761        | 0.42        | 0.393      | 0.36        | 0.38       | 0.38835329        | 0.0251714       | 0.012586        | 0.064816        |
| fibroblast growth factor receptor 3 (achondroplasia, than   | R84974        | 0.46        | 0.45       | 0.502       | 0.53       | 0.48557385        | 0.0370943       | 0.018547        | 0.076393        |
| <b>v-abl Abelson murine leukemia viral oncogene</b>         | <b>H81820</b> | <b>0.27</b> | <b>0.3</b> | <b>0.59</b> | <b>0.6</b> | <b>0.43981537</b> | <b>0.179777</b> | <b>0.089888</b> | <b>0.408756</b> |
| MAP kinase-interacting serine/threonine kinase 1            | H04901        | 0.32        | 0.28       | 0.31        |            | 0.30333333        | 0.0208167       | 0.012019        | 0.068626        |
| stomatin-like protein 1                                     | H06393        | 0.4         | 0.45       | 0.51        |            | 0.45333333        | 0.0550757       | 0.031798        | 0.121491        |
| transcription elongation factor B (SIII), polypeptide 2 (18 | H10355        | 0.508       | 0.307      | 0.357       |            | 0.39087218        | 0.1043854       | 0.060267        | 0.267058        |
| chimerin (chimaerin) 2                                      | H11638        | 0.45        | 0.46       | 0.47        |            | 0.46              | 0.01            | 0.005774        | 0.021739        |
| LBP protein 32                                              | H12032        | 0.41        | 0.51       | 0.55        |            | 0.49              | 0.072111        | 0.041633        | 0.147165        |
| Ral guanine nucleotide exchange factor RalGPS1A             | H12126        | 0.41        | 0.47       | 0.52        |            | 0.46666667        | 0.0550757       | 0.031798        | 0.118019        |
| ribosomal protein L22                                       | H18220        | 0.459       | 0.458      | 0.248       |            | 0.38827994        | 0.1217554       | 0.070296        | 0.313576        |
| frizzled (Drosophila) homolog 10                            | H19514        | 0.21        | 0.22       | 0.21        |            | 0.21333333        | 0.0057735       | 0.003333        | 0.027063        |

|                                                               |        |       |       |       |            |           |          |          |
|---------------------------------------------------------------|--------|-------|-------|-------|------------|-----------|----------|----------|
| leucyl-tRNA synthetase, mitochondrial                         | H19822 | 0.554 | 0.32  | 0.41  | 0.42813592 | 0.1182516 | 0.068273 | 0.276201 |
| hypothetical protein FLJ13159                                 | H19984 | 0.424 | 0.549 | 0.55  | 0.50777334 | 0.0721901 | 0.041679 | 0.14217  |
| solute carrier family 22 (organic anion transporter), mem     | H20345 | 0.451 | 0.2   | 0.23  | 0.29367638 | 0.1370946 | 0.079152 | 0.466822 |
| guanine nucleotide binding protein (G protein), gamma 3       | H20802 | 0.35  | 0.13  | 0.17  | 0.21666667 | 0.1171893 | 0.067659 | 0.540874 |
| cadherin 11, type 2, OB-cadherin (osteoblast)                 | H25418 | 0.53  | 0.42  | 0.38  | 0.44333333 | 0.0776745 | 0.044845 | 0.175206 |
| collagen, type IX, alpha 2                                    | H30258 | 0.17  | 0.51  | 0.34  | 0.34       | 0.17      | 0.09815  | 0.5      |
| mitogen-activated protein kinase 8 interacting protein 2      | H38446 | 0.57  | 0.22  | 0.55  | 0.44666667 | 0.1965536 | 0.11348  | 0.440045 |
| glutamate-ammonia ligase (glutamine synthase)                 | H39089 | 0.517 | 0.04  | 0.12  | 0.2256457  | 0.2554173 | 0.147465 | 1.13194  |
| integrin, alpha 10                                            | H43656 | 0.34  | 0.34  | 0.51  | 0.39666667 | 0.0981495 | 0.056667 | 0.247436 |
| solute carrier family 25 (mitochondrial carrier; citrate tran | H44309 | 0.362 | 0.458 | 0.58  | 0.46667961 | 0.1092139 | 0.063055 | 0.234023 |
| double-stranded RNA specific adenosine deaminase              | H46899 | 0.45  | 0.44  | 0.59  | 0.49333333 | 0.083865  | 0.048419 | 0.169997 |
| transcriptional activator of the c-fos promoter               | H50524 | 0.48  | 0.28  | 0.32  | 0.36       | 0.1058301 | 0.061101 | 0.293972 |
| keratin 8                                                     | H60463 | 0.418 | 0.499 | 0.459 | 0.45871675 | 0.0405522 | 0.023413 | 0.088404 |
| nuclear factor of activated T-cells, cytoplasmic, calcineur   | H63794 | 0.5   | 0.56  | 0.6   | 0.55333333 | 0.0503322 | 0.029059 | 0.090962 |
| crystallin, alpha A                                           | H82654 | 0.51  | 0.14  | 0.4   | 0.35       | 0.19      | 0.109697 | 0.542857 |
| integrin, alpha L (antigen CD11A (p180), lymphocyte fun       | N/A2   | 0.196 | 0.213 | 0.24  | 0.21646041 | 0.022055  | 0.012733 | 0.101889 |
| cytochrome P450, subfamily IIIA, polypeptide 7                | R00015 | 0.473 | 0.5   | 0.55  | 0.50777334 | 0.0389265 | 0.022474 | 0.076661 |
| claudin 4                                                     | R05961 | 0.575 | 0.42  | 0.52  | 0.50494498 | 0.0785077 | 0.045326 | 0.155478 |
| ubiquitin associated protein                                  | R11156 | 0.503 | 0.26  | 0.55  | 0.43777556 | 0.1557168 | 0.089903 | 0.3557   |
| tumor necrosis factor (ligand) superfamily, member 13b        | R16934 | 0.315 | 0.44  | 0.6   | 0.45178975 | 0.1426812 | 0.082377 | 0.315813 |
| collagen, type IV, alpha 1                                    | R26967 | 0.503 | 0.32  | 0.34  | 0.38753398 | 0.1001523 | 0.057823 | 0.258435 |
| MYC-associated zinc finger protein (purine-binding trans      | R28340 | 0.544 | 0.386 | 0.433 | 0.45419907 | 0.0813454 | 0.046965 | 0.179096 |
| RecQ protein-like 5                                           | R31058 | 0.42  | 0.18  | 0.27  | 0.29       | 0.1212436 | 0.07     | 0.418081 |
| prominin (mouse)-like 1                                       | R36499 | 0.38  | 0.4   | 0.53  | 0.43666667 | 0.0814453 | 0.047022 | 0.186516 |
| phosphodiesterase 1B, calmodulin-dependent                    | R45488 | 0.4   | 0.49  | 0.53  | 0.47333333 | 0.0665833 | 0.038442 | 0.140669 |
| ADP-ribosylation factor-like 7                                | R50328 | 0.329 | 0.28  | 0.51  | 0.37284764 | 0.1212319 | 0.069993 | 0.325151 |
| opioid-binding protein/cell adhesion molecule-like            | R52832 | 0.39  | 0.44  | 2.11  | 0.98       | 0.978928  | 0.565184 | 0.998906 |
| collagen, type XI, alpha 1                                    | R52906 | 0.164 | 0.217 | 0.49  | 0.29027944 | 0.175029  | 0.101053 | 0.602967 |
| platelet-derived growth factor receptor-like                  | R53211 | 0.41  | 0.37  | 0.48  | 0.4200377  | 0.0556675 | 0.03214  | 0.13253  |
| cadherin 8, type 2                                            | R56302 | 0.59  | 0.54  | 0.48  | 0.53666667 | 0.0550757 | 0.031798 | 0.102626 |
| dual-specificity tyrosine-(Y)-phosphorylation regulated ki    | R63622 | 0.123 | 0.222 | 0.51  | 0.28512531 | 0.2010138 | 0.116055 | 0.705002 |
| ubiquitin 1                                                   | R67199 | 0.488 | 0.34  | 0.5   | 0.44279612 | 0.0892132 | 0.051507 | 0.201477 |
| ralA binding protein 1                                        | R71155 | 0.3   | 0.42  | 0.486 | 0.4021202  | 0.0944581 | 0.054535 | 0.2349   |
| ribosomal protein L3                                          | R73377 | 0.3   | 0.45  | 0.05  | 0.26666667 | 0.2020726 | 0.116667 | 0.757772 |
| adenylyl cyclase-associated protein 2                         | R75967 | 0.335 | 0.423 | 0.529 | 0.42907443 | 0.0973466 | 0.056203 | 0.226876 |
| RAN binding protein 2-like 1                                  | R82691 | 0.382 | 0.305 | 0.31  | 0.33241747 | 0.0430139 | 0.024834 | 0.129397 |
| EphB6                                                         | R85150 | 0.105 | 0.07  | 0.08  | 0.08508091 | 0.0181624 | 0.010486 | 0.213472 |
| RaP2 interacting protein 8                                    | R86861 | 0.397 | 0.51  | 0.402 | 0.43632705 | 0.0638591 | 0.036869 | 0.146356 |
| centrosomal protein 2                                         | R88035 | 0.392 | 0.1   | 0.1   | 0.19720388 | 0.1683621 | 0.097204 | 0.853746 |
| quiescin Q6                                                   | R88085 | 0.43  | 0.05  | 0.06  | 0.18       | 0.2165641 | 0.125033 | 1.203134 |
| death-associated protein                                      | R92012 | 0.48  | 0.504 | 0.356 | 0.44668852 | 0.0792376 | 0.045748 | 0.177389 |
| cytochrome P450, subfamily IID (debrisoquine, sparteine       | R96672 | 0.37  | 0.38  | 0.49  | 0.41333333 | 0.0665833 | 0.038442 | 0.161089 |
| integrin, beta 3 (platelet glycoprotein IIIa, antigen CD61)   | R97881 | 0.44  | 0.484 | 0.498 | 0.47383455 | 0.030154  | 0.017409 | 0.063638 |



glypican 1 T66194 0.46 0.51 0.6 0.52333333 0.070946 0.040961 0.135566

## HaCat Neo Vs HaCat Delta1

## UPREGULATED GENES

| Gene Name                                                   | GeneID | Normalized Expression Ratio |       |      |      | Aver.ratio | Std.Dev   | Std.Err  | Coff.Var |
|-------------------------------------------------------------|--------|-----------------------------|-------|------|------|------------|-----------|----------|----------|
|                                                             |        | Exp1                        | Exp2  | Exp3 | Exp4 |            |           |          |          |
| Sp2 transcription factor                                    | H00136 | 3.12                        | 1.91  | 3.62 | 2.59 | 2.81       | 0.7327119 | 0.366356 | 0.260752 |
| fatty acid binding protein 5 (psoriasis-associated)         | H00627 | 2.86                        | 3.1   | 3.05 | 2.48 | 2.8725     | 0.2813509 | 0.140675 | 0.097946 |
| guanine nucleotide-releasing factor 2 (specific for crk pro | H02075 | 2.212                       | 4.05  | 4.2  | 3.37 | 3.4579595  | 0.9058498 | 0.452925 | 0.261961 |
| epoxide hydrolase 2, cytoplasmic                            | H04900 | 1.93                        | 1.85  | 1.96 | 1.84 | 1.895      | 0.0591608 | 0.02958  | 0.031219 |
| retinoic acid receptor, beta                                | H09105 | 2.03                        | 2.95  | 2.47 | 3.06 | 2.6275     | 0.4735944 | 0.236797 | 0.180245 |
| ras homolog gene family, member I                           | H09686 | 2.286                       | 2.016 | 2.3  | 2.24 | 2.21028557 | 0.1323007 | 0.06615  | 0.059857 |
| CD1D antigen, d polypeptide                                 | H11025 | 5.41                        | 4.84  | 4.62 | 5.54 | 5.1025     | 0.4425965 | 0.221298 | 0.086741 |
| ubiquitin specific protease 8                               | H12419 | 2.88                        | 8.2   | 2.08 | 2.41 | 3.8925     | 2.8903676 | 1.445184 | 0.742548 |
| putative DNA binding protein                                | H12670 | 3.41                        | 4.02  | 2.9  | 2.89 | 3.305      | 0.5349455 | 0.267473 | 0.161859 |
| collagen, type XI, alpha 2                                  | H13347 | 1.98                        | 2.25  | 2.97 | 2.17 | 2.3425     | 0.4333878 | 0.216694 | 0.185011 |
| small nuclear ribonucleoprotein polypeptides B and B1       | H13355 | 2.258                       | 2.26  | 1.98 | 2.49 | 2.24693397 | 0.2086642 | 0.104332 | 0.092866 |
| reticulocalbin 2, EF-hand calcium binding domain            | H13366 | 2.323                       | 2.13  | 3.7  | 2.61 | 2.69066981 | 0.7011949 | 0.350597 | 0.260602 |
| ATPase, Na+/K+ transporting, alpha 3 polypeptide            | H14143 | 1.856                       | 2.14  | 2.44 | 1.88 | 2.07891485 | 0.2729615 | 0.136481 | 0.1313   |
| Rac/Cdc42 guanine exchange factor (GEF) 6                   | H14999 | 5.273                       | 4.938 | 3.52 | 3.19 | 4.2301999  | 1.0286884 | 0.514344 | 0.243177 |
| retinoic acid receptor, alpha                               | H15010 | 8.84                        | 2.76  | 3.59 | 2.81 | 4.5        | 2.9181844 | 1.459092 | 0.648485 |
| dishevelled 3 (homologous to Drosophila dsh)                | H15755 | 6.03                        | 3.95  | 7.57 | 3.85 | 5.35       | 1.7889289 | 0.894464 | 0.334379 |
| hairy/enhancer-of-split related with YRPW motif 1           | H18233 | 2.5                         | 1.89  | 2.44 | 2.24 | 2.2675     | 0.2751212 | 0.137561 | 0.121332 |
| Link guanine nucleotide exchange factor II                  | H18802 | 2.971                       | 2.49  | 1.93 | 1.8  | 2.29770979 | 0.5394455 | 0.269723 | 0.234775 |
| cyclin D1 (PRAD1- parathyroid adenomatosis 1)               | H20529 | 2.18                        | 2.17  | 2.29 | 2.18 | 2.205      | 0.0568624 | 0.028431 | 0.025788 |
| caveolin 2                                                  | H21748 | 1.97                        | 3.44  | 2.24 | 2.31 | 2.49       | 0.6500769 | 0.325038 | 0.261075 |
| filamin A, alpha (actin-binding protein-280)                | H23101 | 2.19                        | 2.69  | 2.3  | 3.5  | 2.67       | 0.5934644 | 0.296732 | 0.222271 |
| pleckstrin                                                  | H26072 | 1.95                        | 2.49  | 2.66 | 2.11 | 2.3025     | 0.328773  | 0.164386 | 0.14279  |
| glycoprotein, synaptic 2                                    | H46667 | 2.71                        | 2.37  | 2.43 | 2.3  | 2.4525     | 0.1796988 | 0.089849 | 0.073272 |
| elastase 2, neutrophil                                      | H58275 | 1.93                        | 13.05 | 4.06 | 2.55 | 5.3975     | 5.179494  | 2.589747 | 0.95961  |
| protein kinase C, theta                                     | H60824 | 2.19                        | 1.98  | 2.06 | 1.88 | 2.0275     | 0.1309898 | 0.065495 | 0.064607 |
| v-abl Abelson murine leukemia viral oncogene homolog        | H81820 | 2.077                       | 5.38  | 3.02 | 6.05 | 4.1317108  | 1.888248  | 0.944124 | 0.457014 |
| uncoupling protein 4                                        | H83501 | 2.49                        | 2.84  | 2.61 | 2.82 | 2.69       | 0.1691153 | 0.084558 | 0.062868 |
| choline dehydrogenase                                       | H84106 | 2.269                       | 2.102 | 2.41 | 3.85 | 2.65767913 | 0.804803  | 0.402401 | 0.302822 |
| polymerase (RNA) II (DNA directed) polypeptide G            | H84217 | 2.73                        | 2.56  | 4.5  | 2.15 | 2.985      | 1.0389257 | 0.519463 | 0.348049 |
| solute carrier family 12, (potassium-chloride transporter)  | H84293 | 2.18                        | 1.9   | 2.47 | 8.62 | 3.7925     | 3.226736  | 1.613368 | 0.85082  |
| pre-B-cell leukemia transcription factor 3                  | H84325 | 2.55                        | 5.49  | 9.41 | 5.18 | 5.6575     | 2.8280662 | 1.414033 | 0.499879 |

|                                                             |        |       |       |       |       |            |           |          |          |
|-------------------------------------------------------------|--------|-------|-------|-------|-------|------------|-----------|----------|----------|
| ATP-binding cassette, sub-family E (OABP), member 1         | R01105 | 3.456 | 5.8   | 3.61  | 1.83  | 3.67396677 | 1.6301217 | 0.815061 | 0.443695 |
| folliculin                                                  | R01927 | 7.62  | 6.78  | 2.69  | 2.21  | 4.825      | 2.7707099 | 1.385355 | 0.57424  |
| amyloid P component, serum                                  | R07120 | 2.955 | 2.84  | 2.21  | 3.91  | 2.97883697 | 0.7019027 | 0.350951 | 0.23563  |
| ets variant gene 4 (E1A enhancer-binding protein, E1AF)     | R07222 | 8.23  | 6.81  | 5.74  | 4.28  | 6.265      | 1.6707384 | 0.835369 | 0.266678 |
| transcription factor 1, hepatic; LF-B1, hepatic nuclear fac | R07823 | 2.61  | 2.34  | 5.94  | 2.97  | 3.465      | 1.6700599 | 0.83503  | 0.48198  |
| 5,10-methylenetetrahydrofolate synthetase (5-formyltetra    | R08326 | 1.843 | 6.8   | 5.95  | 3.41  | 4.50079958 | 2.2832136 | 1.141607 | 0.507291 |
| protein phosphatase 1, regulatory subunit 6                 | R10183 | 3.98  | 2.07  | 2.78  | 2.82  | 2.9125     | 0.7906695 | 0.395335 | 0.271475 |
| ryanodine receptor 1 (skeletal)                             | R11793 | 2.32  | 2.32  | 2.322 | 2.32  | 2.3205     | 0.001     | 0.0005   | 0.000431 |
| homolog of mouse quaking QKI (KH domain RNA bindin          | R11951 | 3.14  | 1.83  | 2.81  | 2.01  | 2.4475     | 0.6281388 | 0.314069 | 0.256645 |
| apoptosis regulator                                         | R12025 | 2.01  | 1.97  | 1.86  | 1.75  | 1.8975     | 0.1170114 | 0.058506 | 0.061666 |
| NY-REN-24 antigen                                           | R12233 | 2.37  | 2.28  | 2.32  | 2.01  | 2.245      | 0.1609348 | 0.080467 | 0.071686 |
| secreted protein, acidic, cysteine-rich (osteonectin)       | R12744 | 2.15  | 2.31  | 2.61  | 2.13  | 2.3        | 0.2218107 | 0.110905 | 0.096439 |
| PR domain containing 4                                      | R14633 | 2.692 | 2.165 | 2.45  | 2.32  | 2.40668566 | 0.2230801 | 0.11154  | 0.092692 |
| carbohydrate (chondroitin 6/keratan) sulfotransferase 1     | R15740 | 9.36  | 4.67  | 4.1   | 2.19  | 5.08       | 3.0440653 | 1.522033 | 0.599225 |
| tumor necrosis factor (ligand) superfamily, me              | R16934 | 5.03  | 3.97  | 4.24  | 4.72  | 4.49       | 0.4751842 | 0.237592 | 0.105832 |
| mal, T-cell differentiation protein                         | R17499 | 2.34  | 2.21  | 2.02  | 1.89  | 2.115      | 0.1994158 | 0.099708 | 0.094286 |
| methyltransferase-like 1                                    | R17664 | 2.44  | 2.17  | 2.32  | 1.96  | 2.2225     | 0.206942  | 0.103471 | 0.093112 |
| superiorcervical ganglia, neural specific 10                | R19072 | 2.178 | 2.11  | 3.64  | 2.04  | 2.4919107  | 0.7674509 | 0.383725 | 0.307977 |
| anaphase-promoting complex 2                                | R20845 | 2.02  | 2.29  | 2.04  | 3.183 | 2.38337419 | 0.547376  | 0.273688 | 0.229664 |
| EST-YD1 protein                                             | R22229 | 1.88  | 2.24  | 3.63  | 4.07  | 2.955      | 1.0591978 | 0.529599 | 0.358443 |
| core1 UDP-galactose-N-acetylgalactosamine-alpha-R be        | R22983 | 3.04  | 5.43  | 4.12  | 4.096 | 4.1713837  | 0.9785257 | 0.489263 | 0.234581 |
| protein tyrosine phosphatase, non-receptor type 21          | R23593 | 1.833 | 2.2   | 3.72  | 2.81  | 2.64070353 | 0.8247115 | 0.412356 | 0.312307 |
| hydroxysteroid (11-beta) dehydrogenase 2                    | R23749 | 2.23  | 2.19  | 4.17  | 2.09  | 2.67       | 1.0017318 | 0.500866 | 0.37518  |
| nuclear LIM interactor-interacting factor                   | R25117 | 2.338 | 2.13  | 2.95  | 2.7   | 2.52949    | 0.3661413 | 0.183071 | 0.144749 |
| matrix Gla protein                                          | R26327 | 2.02  | 1.94  | 2.22  | 1.92  | 2.025      | 0.1369915 | 0.068496 | 0.06765  |
| Down syndrome critical region gene 1-like 2                 | R26919 | 4.351 | 2.567 | 1.914 | 2.31  | 2.78544393 | 1.0777201 | 0.53886  | 0.386911 |
| cytochrome P450, subfamily 46 (cholesterol 24-hydroxyl      | R36281 | 3.832 | 3.825 | 3.382 | 2.49  | 3.38210735 | 0.6308128 | 0.315406 | 0.186515 |
| myelin protein zero-like 1                                  | R37525 | 2.329 | 1.86  | 5.03  | 1.93  | 2.78726156 | 1.509365  | 0.754683 | 0.541523 |
| phospholipase C, beta 2                                     | R37960 | 4.09  | 3.26  | 8.25  | 7.26  | 5.715      | 2.4139111 | 1.206956 | 0.422382 |
| dedicator of cyto-kinesis 3                                 | R39312 | 2.798 | 2.246 | 1.86  | 1.8   | 2.17598306 | 0.4592124 | 0.229606 | 0.211037 |
| myelin associated glycoprotein                              | R42831 | 1.91  | 2.362 | 2.62  | 2.12  | 2.25295298 | 0.3066903 | 0.153345 | 0.136128 |
| nuclear factor (erythroid-derived 2)-like 3                 | R43198 | 2.13  | 1.94  | 2.22  | 1.98  | 2.0675     | 0.1304799 | 0.06524  | 0.06311  |
| inhibitor of DNA binding 4, dominant negative helix-loop-   | R43511 | 2.13  | 2.04  | 2.7   | 1.93  | 2.2        | 0.34322   | 0.17161  | 0.156009 |
| Snf2-related CBP activator protein                          | R44375 | 2.678 | 2.381 | 7.62  | 6.27  | 4.73729751 | 2.6109482 | 1.305474 | 0.551147 |
| similar to Xenopus gamma-tubulin interacting protein (ye    | R50785 | 1.99  | 1.94  | 2.82  | 1.77  | 2.13       | 0.4695388 | 0.234769 | 0.220441 |
| v-myc avian myelocytomatosis viral related oncogene, n      | R52824 | 2.76  | 2.06  | 3.03  | 2.11  | 2.49       | 0.4809019 | 0.240451 | 0.193133 |
| steroid-5-alpha-reductase, alpha polypeptide 1 (3-oxo-5 ;   | R54327 | 2.374 | 2.138 | 4.77  | 3.44  | 3.18048546 | 1.2015463 | 0.600773 | 0.377787 |
| MADS box transcription enhancer factor 2, polypeptide C     | R59202 | 2.857 | 2.485 | 2.26  | 4.21  | 2.95291018 | 0.8734318 | 0.436716 | 0.295787 |
| paralemmin                                                  | R60222 | 2.02  | 2.9   | 2.98  | 2.85  | 2.6875     | 0.4482094 | 0.224105 | 0.166776 |
| fibronectin leucine rich transmembrane protein 2            | R60392 | 1.97  | 2.37  | 2.23  | 2.65  | 2.305      | 0.2834902 | 0.141745 | 0.122989 |
| fatty acid binding protein 7, brain                         | R60407 | 2.07  | 1.97  | 4.62  | 3.36  | 3.005      | 1.2489596 | 0.62448  | 0.415627 |
| discoidin domain receptor family, member 2                  | R60908 | 2.08  | 1.99  | 2.46  | 3.2   | 2.4325     | 0.5507192 | 0.27536  | 0.226401 |
| dedicator of cyto-kinesis 2                                 | R62401 | 2.118 | 2.6   | 2.47  | 3.87  | 2.76441551 | 0.7647048 | 0.382352 | 0.276624 |

|                                                                               |        |       |       |       |       |            |           |          |          |
|-------------------------------------------------------------------------------|--------|-------|-------|-------|-------|------------|-----------|----------|----------|
| hyaluronoglucosaminidase 4                                                    | R67698 | 2.34  | 2.08  | 2.37  | 1.82  | 2.1525     | 0.257083  | 0.128541 | 0.119435 |
| AU RNA-binding protein/enoyl-Coenzyme A hydratase                             | R67993 | 5.51  | 2.14  | 4.04  | 6.47  | 4.54       | 1.8864252 | 0.943213 | 0.415512 |
| paired-like homeodomain transcription factor 2                                | R78177 | 2.37  | 2.21  | 2.02  | 1.86  | 2.115      | 0.2221861 | 0.111093 | 0.105053 |
| protein tyrosine phosphatase, receptor type, C                                | R80064 | 1.92  | 4.71  | 4.34  | 3     | 3.4925     | 1.2800879 | 0.640044 | 0.366525 |
| microtubule-associated protein, RP/EB family, member 3                        | R80191 | 2.25  | 2.15  | 2.15  | 2.6   | 2.2875     | 0.2136001 | 0.1068   | 0.093377 |
| golgi autoantigen, golgin subfamily a, 4                                      | R81347 | 2.109 | 2.04  | 2.14  | 1.85  | 2.03468706 | 0.1300172 | 0.065009 | 0.0639   |
| fibroblast growth factor receptor 3 (achondroplasia, thanatophoric dysplasia) | R84974 | 2.96  | 4.59  | 2.85  | 1.811 | 3.05275182 | 1.148154  | 0.574077 | 0.376105 |
| iduronidase, alpha-L-                                                         | R86686 | 3.469 | 2.31  | 4.68  | 3.65  | 3.52734164 | 0.971073  | 0.485536 | 0.275299 |
| v-ets avian erythroblastosis virus E26 oncogene related 1                     | R87572 | 4.82  | 6.62  | 5.77  | 2.66  | 4.9675     | 1.705     | 0.8525   | 0.343231 |
| dipeptidylpeptidase VI                                                        | R87715 | 2.89  | 2     | 4.49  | 2.63  | 3.0025     | 1.0597287 | 0.529864 | 0.352949 |
| muscle specific gene                                                          | R87846 | 2.26  | 2.06  | 2.62  | 1.77  | 2.1775     | 0.3570598 | 0.17853  | 0.163977 |
| RaP2 interacting protein 8                                                    | R87923 | 2.789 | 2.705 | 2.21  | 1.91  | 2.40357217 | 0.4166152 | 0.208308 | 0.173332 |
| Link guanine nucleotide exchange factor II                                    | R87983 | 1.998 | 1.861 | 2.24  | 4.19  | 2.57219367 | 1.0898691 | 0.544935 | 0.423712 |
| actin, gamma 2, smooth muscle, enteric                                        | R90884 | 2.534 | 2.364 | 2.57  | 2.55  | 2.50455867 | 0.0945514 | 0.047276 | 0.037752 |
| cadherin 8, type 2                                                            | T65284 | 2.58  | 2.35  | 2.42  | 2.64  | 2.4975     | 0.1352467 | 0.067623 | 0.054153 |
| tumor necrosis factor receptor superfamily, member 1A                         | T65422 | 2.99  | 1.83  | 3.77  | 2.51  | 2.775      | 0.8163945 | 0.408197 | 0.294196 |
| dual specificity phosphatase 6                                                | T65557 | 2.105 | 2.82  | 2.57  | 1.99  | 2.37123201 | 0.3903661 | 0.195183 | 0.164626 |
| glycogen synthase kinase 3 alpha                                              | T72585 | 2.53  | 2.42  | 2.64  | 2.22  | 2.4525     | 0.1791415 | 0.089571 | 0.073044 |
| nicastrin                                                                     | T74007 | 4.68  | 2.3   | 2.71  | 1.94  | 2.9075     | 1.2228212 | 0.611411 | 0.420575 |
| retinoic acid receptor, alpha                                                 | T75564 | 1.89  | 3.39  | 2.12  | 2.36  | 2.44       | 0.6617653 | 0.330883 | 0.271215 |
| ATP-binding cassette, sub-family B (MDR/TAP), member 1                        | T78010 | 2.3   | 1.97  | 2.35  | 1.95  | 2.1425     | 0.2118765 | 0.105938 | 0.098892 |
| death-associated protein kinase 1                                             | T78664 | 2.85  | 2.61  | 2.24  | 2.48  | 2.545      | 0.2546239 | 0.127312 | 0.100049 |
| adenylate cyclase 2 (brain)                                                   | T80236 | 2.37  | 1.9   | 2.88  | 2.51  | 2.415      | 0.4051749 | 0.202587 | 0.167774 |
| CD34 antigen                                                                  | T80274 | 3.26  | 2.37  | 3     | 2.31  | 2.735      | 0.468935  | 0.234467 | 0.171457 |
| expressed in activated T/LAK lymphocytes                                      | T86350 | 3.345 | 1.91  | 3.25  | 3.49  | 2.99868899 | 0.7324729 | 0.366236 | 0.244264 |
| heterogeneous nuclear ribonucleoprotein F                                     | T86631 | 2.37  | 2.13  | 6.49  | 4.05  | 3.76       | 2.0104726 | 1.005236 | 0.5347   |
| Sp2 transcription factor                                                      | H00136 | 2.801 | 2.89  | 3.386 | 2.776 | 2.96338276 | 0.2859297 | 0.142965 | 0.096488 |
| protein-kinase, interferon-inducible double stranded RNA                      | H00619 | 2.01  | 2.67  | 2.14  |       | 2.27333333 | 0.3496188 | 0.201853 | 0.153791 |
| MAP kinase-interacting serine/threonine kinase                                | H04901 | 2.167 | 2.072 | 2.42  |       | 2.21966852 | 0.1799256 | 0.10388  | 0.08106  |
| butyrylcholinesterase                                                         | H05834 | 2.8   | 2.34  | 2.15  |       | 2.43       | 0.3342155 | 0.192959 | 0.137537 |
| biphenyl hydrolase-like (serine hydrolase; breast epithelial)                 | H06847 | 1.964 | 2.54  | 2.84  |       | 2.44786027 | 0.4454155 | 0.257161 | 0.181961 |
| annexin A6                                                                    | H08529 | 2.073 | 1.795 | 1.81  |       | 1.89270682 | 0.1560397 | 0.09009  | 0.082443 |
| adenylate cyclase activating polypeptide 1 (pituitary) receptor               | H09078 | 2.06  | 2.57  | 1.91  |       | 2.18       | 0.3459769 | 0.19975  | 0.158705 |
| guanine nucleotide binding protein (G protein), q polypeptide                 | H09598 | 2.064 | 3.32  | 2.23  |       | 2.53812738 | 0.6821663 | 0.393849 | 0.268768 |
| kinesin family member 3C                                                      | H11052 | 2.252 |       | 1.86  |       | 2.05616822 | 0.2774238 | 0.160171 | 0.134923 |
| cadherin 8, type 2                                                            | H14496 | 2.11  | 2.73  | 2.18  |       | 2.34       | 0.3395585 | 0.196044 | 0.14511  |
| PWP2 (periodic tryptophan protein, yeast) homolog                             | H16818 | 2.86  | 2.56  | 1.9   |       | 2.44       | 0.4911212 | 0.283549 | 0.201279 |
| protocadherin beta 15                                                         | H17173 | 1.96  | 1.84  | 2.12  |       | 1.97333333 | 0.1404754 | 0.081104 | 0.071187 |
| leukocyte immunoglobulin-like receptor, subfamily B (with CD28)               | H18946 | 3.12  | 2.11  | 1.96  |       | 2.39666667 | 0.6308988 | 0.36425  | 0.26324  |
| ADP-ribosylation factor 1                                                     | H20379 | 2.256 | 2.062 | 2.35  |       | 2.22269833 | 0.1471189 | 0.084939 | 0.066189 |
| Rab9 effector p40                                                             | H20945 | 5.73  | 2.14  | 1.99  |       | 3.28666667 | 2.1173175 | 1.222434 | 0.644214 |
| v-abl Abelson murine leukemia viral oncogene homolog 2                        | H23248 | 2.1   | 4.79  | 3.6   |       | 3.49666667 | 1.3479738 | 0.778253 | 0.385503 |
| diacylglycerol kinase, gamma (90kD)                                           | H23494 | 2.71  | 5.5   | 3.79  |       | 4          | 1.4068049 | 0.812219 | 0.351701 |

|                                                             |               |             |             |             |            |           |          |          |
|-------------------------------------------------------------|---------------|-------------|-------------|-------------|------------|-----------|----------|----------|
| potassium voltage-gated channel, KQT-like subfamily, m      | H23701        | 3.096       | 2.366       | 1.8         | 2.42053568 | 0.6495371 | 0.37501  | 0.268344 |
| bullous pemphigoid antigen 1 (230/240kD)                    | H25843        | 1.944       | 1.97        | 1.97        | 1.96149327 | 0.0147341 | 0.008507 | 0.007512 |
| zinc finger protein 238                                     | H29607        | 2.503       | 2.44        | 2.83        | 2.59086535 | 0.2094483 | 0.120925 | 0.080841 |
| glutathione S-transferase A2                                | H56050        | 2.011       | 2.42        | 1.76        | 2.06356552 | 0.3331611 | 0.192351 | 0.161449 |
| phosphofructokinase, muscle                                 | H59568        | 2.338       | 2.034       | 3.57        | 2.64719258 | 0.8135332 | 0.469694 | 0.307319 |
| heat shock 70kD protein 8                                   | H62557        | 3.96        | 3.32        | 2.36        | 3.21333333 | 0.8053157 | 0.464949 | 0.250617 |
| hsp70-interacting protein                                   | H84149        | 2.46        | 2.35        | 1.99        | 2.26666667 | 0.2458319 | 0.141931 | 0.108455 |
| programmed cell death 7                                     | H84606        | 3.58        | 3.01        | 2.43        | 3.00666667 | 0.5750072 | 0.331981 | 0.191244 |
| <b>caspase recruitment domain 4</b>                         | <b>R02588</b> | <b>2.07</b> | <b>2</b>    | <b>2.26</b> | 2.11       | 0.1345362 | 0.077675 | 0.063761 |
| karyopherin beta 2b, transportin                            | R08597        | 2.12        | 3.3         | 1.92        | 2.44666667 | 0.7457435 | 0.430555 | 0.3048   |
| nuclear receptor coactivator 2                              | R08880        | 2.94        | 2.92        | 2.5         | 2.78666667 | 0.2484619 | 0.14345  | 0.089161 |
| inositol 1,4,5-triphosphate receptor, type 2                | R09245        | 9.11        | 2.45        | 8.87        | 6.81       | 3.7777771 | 2.181101 | 0.55474  |
| sphingomyelin phosphodiesterase 1, acid lysosomal (aci      | R09248        | 3.18        | 1.93        | 2.11        | 2.40666667 | 0.6757465 | 0.390142 | 0.280781 |
| rec                                                         | R09585        | 2.94        | 2.92        | 2.5         | 2.78666667 | 0.2484619 | 0.14345  | 0.089161 |
| ring finger protein 9                                       | R10282        | 3.4         | 1.91        | 2.07        | 2.46       | 0.8179853 | 0.472264 | 0.332514 |
| aldehyde dehydrogenase 5 family, member A1 (succinat        | R11674        | 3.16        | 2.07        | 1.84        | 2.35666667 | 0.7051477 | 0.407117 | 0.299214 |
| nucleolar protein 1 (120kD)                                 | R11719        | 3.61        | 3.34        | 1.93        | 2.96       | 0.9021641 | 0.520865 | 0.304785 |
| microtubule-associated protein tau                          | R12882        | 2.05        | 1.84        | 2.52        | 2.13666667 | 0.3481858 | 0.201025 | 0.162957 |
| mitogen-activated protein kinase-activated protein kinase   | R13561        | 2.05        | 1.84        | 2.52        | 2.13666667 | 0.3481858 | 0.201025 | 0.162957 |
| cofactor required for Sp1 transcriptional activation, subur | R14275        | 2.07        | 1.94        | 2.51        | 2.17333333 | 0.2987195 | 0.172466 | 0.137448 |
| nuclear factor, interleukin 3 regulated                     | R14288        | 2.2         | 9.15        | 3.68        | 5.01       | 3.6609152 | 2.11363  | 0.730722 |
| piccolo (presynaptic cytomatrix protein)                    | R14631        | 1.94        | 2.1         | 2.04        | 2.02666667 | 0.080829  | 0.046667 | 0.039883 |
| serine/threonine kinase with Dbl- and pleckstrin homolog    | R19839        | 2.24        | 3.28        | 2.16        | 2.56       | 0.62482   | 0.36074  | 0.24407  |
| zinc finger protein ANC_2H01                                | R19999        | 1.87        | 2.88        | 1.83        | 2.19333333 | 0.595007  | 0.343527 | 0.27128  |
| chondroitin sulfate proteoglycan BEHAB/brevican             | R20427        | 2.09        | 3.15        | 2.68        | 2.64       | 0.5311309 | 0.306649 | 0.201186 |
| basonuclin                                                  | R26526        | 2.431       | 1.84        | 2.22        | 2.16363937 | 0.2994636 | 0.172895 | 0.138407 |
| DEAD/H (Asp-Glu-Ala-Asp/His) box polypeptide 3              | R34214        | 1.89        | 1.84        | 2.01        | 1.91333333 | 0.0873689 | 0.050442 | 0.045663 |
| cytochrome P450 retinoid metabolizing protein               | R34539        | 2.099       | 2.08        | 1.8         | 1.99285369 | 0.1672738 | 0.096576 | 0.083937 |
| pescadillo (zebrafish) homolog 1, containing BRCT domæ      | R37665        | 2.35        | 2.15        | 1.89        | 2.13       | 0.2306513 | 0.133167 | 0.108287 |
| Ras association (RalGDS/AF-6) domain family 2               | R37954        | 3.09        | 2.77        | 1.98        | 2.61333333 | 0.5713434 | 0.329865 | 0.218626 |
| mitogen-activated protein kinase 4                          | R38384        | 3.25        | 2.7         | 1.81        | 2.58666667 | 0.726659  | 0.419537 | 0.280925 |
| cysteine and histidine rich protein                         | R40870        | 2.23        | 5.18        | 2.17        | 3.19333333 | 1.7207653 | 0.993484 | 0.538862 |
| <b>non-metastatic cells 1, protein (NM23A) expre</b>        | <b>R53559</b> | <b>2.34</b> | <b>2.28</b> | <b>2.42</b> | 2.34666667 | 0.0702377 | 0.040552 | 0.029931 |
| cadherin 13, H-cadherin (heart)                             | R55805        | 2.21        | 4.53        | 3.18        | 3.30666667 | 1.1651752 | 0.672714 | 0.352372 |
| chondroitin sulfate proteoglycan 4 (melanoma-associated     | R61690        | 1.84        | 1.95        | 1.93        | 1.90666667 | 0.0585947 | 0.03383  | 0.030731 |
| cytokine inducible SH2-containing protein                   | R63534        | 2.105       | 2.22        | 2.94        | 2.42164268 | 0.4525827 | 0.261299 | 0.186891 |
| bone morphogenetic protein 6                                | R67103        | 3.343       | 3.25        | 1.92        | 2.8375572  | 0.7959776 | 0.459558 | 0.280515 |
| Fas (TNFRSF6) associated factor 1                           | R70834        | 2.98        | 5.93        | 4.24        | 4.38325099 | 1.4803311 | 0.85467  | 0.337724 |
| ribosomal protein L3                                        | R73377        | 6.16        | 7.95        | 3.86        | 5.99       | 2.0502927 | 1.183737 | 0.342286 |
| ubiquitin specific protease 4 (proto-oncogene)              | R77960        | 2.9         | 2.44        | 2.18        | 2.50650961 | 0.3643461 | 0.210355 | 0.14536  |
| microtubule-associated protein 1A                           | R87232        | 2.194       | 4.57        | 2.69        | 3.15135532 | 1.2533564 | 0.723626 | 0.39772  |
| lysosomal-associated membrane protein 1                     | R89056        | 4.66        | 4.54        | 2.64        | 3.94666667 | 1.1331961 | 0.654251 | 0.287127 |
| eukaryotic translation initiation factor 4A, isoform 2      | R89143        | 2.97        | 11.55       | 8.04        | 7.51996192 | 4.3136318 | 2.490477 | 0.573624 |

|                                              |        |      |      |      |            |           |          |          |
|----------------------------------------------|--------|------|------|------|------------|-----------|----------|----------|
| dedicator of cyto-kinesis 3                  | T80400 | 2.25 | 1.9  | 9.39 | 4.51333333 | 4.2269414 | 2.440426 | 0.936545 |
| inositol 1,4,5-triphosphate receptor, type 3 | T80464 | 2.3  | 2.23 | 2.48 | 2.33666667 | 0.1289703 | 0.074461 | 0.055194 |
| activating transcription factor 2            | T83053 | 1.92 | 4.39 | 2.88 | 3.06333333 | 1.245164  | 0.718896 | 0.406474 |

## HaCat Neo Vs HaCat Delta1

## DOWNREGULATED GENES

| Gene Name                                                                       | GeneID | Normalized Expression Ratio |       |       |       | Aver.ratio | Std.Dev   | Std.Err  | Coff.Var |
|---------------------------------------------------------------------------------|--------|-----------------------------|-------|-------|-------|------------|-----------|----------|----------|
|                                                                                 |        | Exp1                        | Exp2  | Exp3  | Exp4  |            |           |          |          |
| adducin 3 (gamma)                                                               | H00946 | 0.402                       | 0.478 | 0.4   | 0.4   | 0.4200433  | 0.0388403 | 0.01942  | 0.092467 |
| spermidine/spermine N1-acetyltransferase                                        | H03112 | 0.322                       | 0.34  | 0.21  | 0.21  | 0.27031899 | 0.070035  | 0.035018 | 0.259083 |
| proteolipid protein (Pelizaeus-Merzbacher disease, spastin)                     | H06957 | 0.42                        | 0.45  | 0.47  | 0.38  | 0.43       | 0.0391578 | 0.019579 | 0.091065 |
| hypothetical protein DKFZp762P2111                                              | H08319 | 0.47                        | 0.49  | 0.2   | 0.26  | 0.355      | 0.1466288 | 0.073314 | 0.413039 |
| SGC32445 protein                                                                | H11651 | 0.332                       | 0.37  | 0.16  | 0.22  | 0.27039826 | 0.0972849 | 0.048642 | 0.359784 |
| C-type (calcium dependent, carbohydrate-recognition domain)                     | H11732 | 0.321                       | 0.378 | 0.27  | 0.29  | 0.31480581 | 0.0470351 | 0.023518 | 0.14941  |
| Ral guanine nucleotide exchange factor RalG1                                    | H12126 | 0.28                        | 0.43  | 0.28  | 0.45  | 0.36       | 0.0927362 | 0.046368 | 0.257601 |
| Mad4 homolog                                                                    | H12149 | 0.426                       | 0.49  | 0.16  | 0.47  | 0.38661531 | 0.153388  | 0.076694 | 0.396746 |
| Sarcolemmal-associated protein                                                  | H12660 | 0.581                       | 0.348 | 0.45  | 0.53  | 0.47715281 | 0.1018862 | 0.050943 | 0.21353  |
| lysophosphatidic acid acyltransferase-delta                                     | H18455 | 0.32                        | 0.52  | 0.23  | 0.31  | 0.345      | 0.1234234 | 0.061712 | 0.357749 |
| LIM domain only 7                                                               | H21060 | 0.461                       | 0.52  | 0.54  | 0.54  | 0.51514538 | 0.0375998 | 0.0188   | 0.072989 |
| keratin 15                                                                      | H21366 | 0.499                       | 0.16  | 0.18  | 0.39  | 0.30719757 | 0.1647325 | 0.082366 | 0.536243 |
| schwannomin interacting protein 1                                               | H24397 | 0.53                        | 0.37  | 0.38  | 0.42  | 0.425      | 0.0732575 | 0.036629 | 0.172371 |
| cellular repressor of E1A-stimulated genes                                      | H28623 | 0.433                       | 0.449 | 0.54  | 0.58  | 0.50048899 | 0.0709153 | 0.035458 | 0.141692 |
| proteolipid protein (Pelizaeus-Merzbacher disease, spastin)                     | H28975 | 0.44                        | 0.44  | 0.27  | 0.35  | 0.375      | 0.0818535 | 0.040927 | 0.218276 |
| vitronectin (serum spreading factor, somatomedin B, connective tissue type III) | H29155 | 0.475                       | 0.498 | 0.39  | 0.29  | 0.41337833 | 0.0945218 | 0.047261 | 0.228657 |
| thyroid hormone receptor interactor 8                                           | H43746 | 0.46                        | 0.47  | 0.36  | 0.4   | 0.4225     | 0.0518813 | 0.025941 | 0.122796 |
| PFTAIRE protein kinase 1                                                        | H46382 | 0.197                       | 0.47  | 0.58  | 0.07  | 0.32918502 | 0.2362594 | 0.11813  | 0.717771 |
| excision repair cross-complementing rodent repair deficiency                    | H47146 | 0.58                        | 0.59  | 0.45  | 0.5   | 0.53       | 0.0668331 | 0.033417 | 0.1261   |
| BCL2-associated athanogene 4                                                    | H53288 | 0.41                        | 0.43  | 0.49  | 0.33  | 0.415      | 0.0660808 | 0.03304  | 0.159231 |
| aldo-keto reductase family 1, member C2 (dihydrodiol dehydratase)               | H64003 | 0.375                       | 0.387 | 0.34  | 0.35  | 0.36309595 | 0.0218558 | 0.010928 | 0.060193 |
| protein kinase, cAMP-dependent, regulatory, type II, alpha                      | R23436 | 0.32                        | 0.4   | 0.21  | 0.31  | 0.31       | 0.0778888 | 0.038944 | 0.251254 |
| citron (rho-interacting, serine/threonine kinase 21)                            | R24294 | 0.569                       | 0.572 | 0.35  | 0.35  | 0.46009865 | 0.1271365 | 0.063568 | 0.276324 |
| zinc finger protein 185 (LIM domain)                                            | R25798 | 0.5                         | 0.54  | 0.32  | 0.37  | 0.4325     | 0.1043631 | 0.052182 | 0.241302 |
| interleukin 1 receptor accessory protein                                        | R37898 | 0.402                       | 0.406 | 0.33  | 0.33  | 0.36686553 | 0.0426032 | 0.021302 | 0.116128 |
| A kinase (PRKA) anchor protein (yotiao) 9                                       | R59109 | 0.426                       | 0.58  | 0.59  | 0.36  | 0.48911531 | 0.1140673 | 0.057034 | 0.233211 |
| NADH dehydrogenase (ubiquinone) flavoprotein 1 (51kDa)                          | R67754 | 0.265                       | 0.323 | 0.59  | 0.49  | 0.41701388 | 0.1497029 | 0.074851 | 0.358988 |
| oligoprenin 1                                                                   | R81942 | 0.28                        | 0.4   | 0.37  | 0.39  | 0.36       | 0.0547723 | 0.027386 | 0.152145 |
| RAN binding protein 2-like 1                                                    | R82691 | 0.291                       | 0.378 | 0.11  | 0.12  | 0.22463358 | 0.1315565 | 0.065778 | 0.585649 |
| H1 histone family, member 2                                                     | R98517 | 0.361                       | 0.5   | 0.5   | 0.42  | 0.4452203  | 0.0677022 | 0.033851 | 0.152065 |
| keratin 13                                                                      | T83421 | 0.496                       | 0.505 | 0.218 | 0.233 | 0.36296127 | 0.1589456 | 0.079473 | 0.437913 |
| claudin 1                                                                       | H03348 | 0.25                        | 0.27  | 0.48  |       | 0.33333333 | 0.1274101 | 0.07356  | 0.38223  |
| DNA (cytosine-5-)-methyltransferase 3 alpha                                     | H03349 | 0.57                        | 0.44  | 0.49  |       | 0.5        | 0.0655744 | 0.037859 | 0.131149 |

|                                                           |        |       |      |       |            |           |          |          |
|-----------------------------------------------------------|--------|-------|------|-------|------------|-----------|----------|----------|
| cannabinoid receptor 1 (brain)                            | H06204 | 0.32  | 0.41 | 0.49  | 0.40666667 | 0.085049  | 0.049103 | 0.209137 |
| protein tyrosine phosphatase, receptor type, N polypeptid | H06958 | 0.56  | 0.45 | 0.49  | 0.5        | 0.0556776 | 0.032146 | 0.111355 |
| vascular cell adhesion molecule 1                         | H07071 | 0.55  | 0.34 | 0.44  | 0.44333333 | 0.1050397 | 0.060645 | 0.236932 |
| receptor tyrosine kinase-like orphan receptor             | H10666 | 0.445 | 0.43 | 0.57  | 0.48181162 | 0.0767623 | 0.044319 | 0.15932  |
| p21-activated protein kinase 6                            | H15287 | 0.453 | 0.47 | 0.422 | 0.44836224 | 0.02422   | 0.013983 | 0.054019 |
| pM5 protein                                               | H17327 | 0.49  | 0.49 | 0.38  | 0.45333333 | 0.0635085 | 0.036667 | 0.140092 |
| ribosomal protein L5                                      | H17614 | 0.52  | 0.3  | 0.48  | 0.43333333 | 0.1171893 | 0.067659 | 0.270437 |
| cell cycle related kinase                                 | H17616 | 0.41  | 0.38 | 0.44  | 0.41       | 0.03      | 0.017321 | 0.073171 |
| p53-inducible ribonucleotide reductase small subunit 2 h  | H18868 | 0.45  | 0.34 | 0.44  | 0.41       | 0.0608276 | 0.035119 | 0.14836  |
| ESTs, Highly similar to 3-phosphoinositide de             | H20164 | 0.5   | 0.39 | 0.44  | 0.44333333 | 0.0550757 | 0.031798 | 0.124231 |
| carbonic anhydrase II                                     | H23187 | 0.416 | 0.58 | 0.58  | 0.52517    | 0.0949683 | 0.05483  | 0.180834 |
| sal (Drosophila)-like 3                                   | H23192 | 0.43  | 0.45 | 0.5   | 0.46       | 0.0360555 | 0.020817 | 0.078382 |
| immunoglobulin kappa constant                             | H25578 | 0.41  | 0.51 | 0.41  | 0.44333333 | 0.057735  | 0.033333 | 0.130229 |
| phosphoinositide-3-kinase, regulatory subunit             | H30017 | 0.48  | 0.54 | 0.52  | 0.51333333 | 0.0305505 | 0.017638 | 0.059514 |
| step II splicing factor SLU7                              | H30114 | 0.5   | 0.39 | 0.46  | 0.45       | 0.0556776 | 0.032146 | 0.123728 |
| egf-like module containing, mucin-like, hormone recepto   | H43635 | 0.53  | 0.33 | 0.38  | 0.41333333 | 0.1040833 | 0.060093 | 0.251814 |
| potassium voltage-gated channel, KQT-like subfamily, m    | H45987 | 0.36  | 0.3  | 0.47  | 0.37666667 | 0.0862168 | 0.049777 | 0.228894 |
| tumor protein p53-binding protein, 1                      | H51388 | 2.419 | 1.85 | 1.76  | 2.00981918 | 0.3575999 | 0.20646  | 0.177926 |
| D-type cyclin-interacting protein 1                       | H53894 | 0.401 | 0.37 | 0.41  | 0.39357952 | 0.0209389 | 0.012089 | 0.053201 |
| BTG family, member 2                                      | H69582 | 0.46  | 0.55 | 0.48  | 0.49666667 | 0.0472582 | 0.027285 | 0.095151 |
| cyclin-dependent kinase 6                                 | H73724 | 0.45  | 0.5  | 0.48  | 0.47666667 | 0.0251661 | 0.01453  | 0.052796 |
| polymerase (RNA) II (DNA directed) polypeptide J (13.3k   | H85095 | 0.25  | 0.41 | 0.43  | 0.36333333 | 0.0986577 | 0.05696  | 0.271535 |
| junctional adhesion molecule                              | R01692 | 0.4   | 0.42 | 0.44  | 0.42       | 0.02      | 0.011547 | 0.047619 |
| regulator of G-protein signalling 6                       | R12209 | 0.48  | 0.3  | 0.53  | 0.43666667 | 0.1209683 | 0.069841 | 0.277027 |
| retinoid x receptor interacting protein                   | R18164 | 0.13  | 0.13 | 0.49  | 0.25       | 0.2078461 | 0.12     | 0.831384 |
| carbonyl reductase 1                                      | R19107 | 0.43  | 0.54 | 0.41  | 0.46       | 0.07      | 0.040415 | 0.152174 |
| endothelin converting enzyme 1                            | R24778 | 0.51  | 0.4  | 0.47  | 0.46       | 0.0556776 | 0.032146 | 0.121038 |
| neuronatin                                                | R32695 | 0.45  | 0.49 | 0.43  | 0.45666667 | 0.0305505 | 0.017638 | 0.066899 |
| platelet/endothelial cell adhesion molecule (C            | R33251 | 0.43  | 0.5  | 0.46  | 0.46333333 | 0.0351188 | 0.020276 | 0.075796 |
| homeo box B5                                              | R33892 | 0.42  | 0.51 | 0.53  | 0.48666667 | 0.0585947 | 0.03383  | 0.1204   |
| oxidative 3 alpha hydroxysteroid dehydrogenase; retinol   | R35197 | 0.38  | 0.39 | 0.41  | 0.39333333 | 0.0152753 | 0.008819 | 0.038835 |
| CGI-108 protein                                           | R36651 | 0.52  | 0.57 | 0.45  | 0.51333333 | 0.0602771 | 0.034801 | 0.117423 |
| His-domain protein tyrosine phosphatase                   | R52028 | 0.56  | 0.34 | 0.35  | 0.41666667 | 0.124231  | 0.071725 | 0.298154 |
| oculocutaneous albinism II (pink-eye dilution (murine) ho | R52315 | 0.59  | 0.42 | 0.45  | 0.48666667 | 0.0907377 | 0.052387 | 0.186447 |
| arginase, type II                                         | R55110 | 0.502 | 0.21 | 0.28  | 0.33070037 | 0.1525079 | 0.08805  | 0.461166 |
| ets variant gene 5 (ets-related molecule)                 | R66676 | 0.458 | 0.29 | 0.49  | 0.4126805  | 0.1074394 | 0.06203  | 0.260345 |
| inhibin, beta A (activin A, activin AB alpha polypeptide) | R67237 | 0.51  | 0.57 | 0.33  | 0.47       | 0.1249    | 0.072111 | 0.265745 |
| karyopherin alpha 3 (importin alpha 4)                    | R79164 | 0.53  | 0.47 | 0.44  | 0.48       | 0.0458258 | 0.026458 | 0.09547  |
| EphB6                                                     | R85150 | 0.25  | 0.3  | 0.43  | 0.32666667 | 0.0929157 | 0.053645 | 0.284436 |
| laminin, gamma 3                                          | R17731 | 0.464 | 0.36 | 0.56  | 0.46125727 | 0.1000237 | 0.057749 | 0.21685  |
